# Supplementary material for: The liaison between respiratory failure and high blood pressure: evidence from COVID-19 patients
Source: PubMed Central journal article supplement — Eur Respir J. 2020 Jul 30;56(1):2001157. doi: 10.1183/13993003.01157-2020 (PMC7241109; doi:10.1183/13993003.01157-2020), 2020-07-30
Supplement: ERJ-01157-2020.Shareable.pdf [file ERJ-01157-2020.Shareable.pdf]

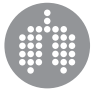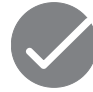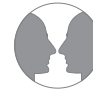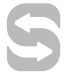

SHAREABLE PDF

# The liaison between respiratory failure and high blood pressure: evidence from COVID-19 patients

Marco Vicenzi <sup>1,2</sup>, Roberta Di Cosola<sup>2</sup>, Massimiliano Ruscica <sup>3</sup>, Angelo Ratti<sup>2</sup>, Irene Rota<sup>1</sup>, Federica Rota<sup>4</sup>, Valentina Bollati<sup>4</sup>, Stefano Aliberti <sup>5,6</sup> and Francesco Blasi<sup>5,6</sup>

**Affiliations:** <sup>1</sup>Fondazione IRCCS Ca' Granda Ospedale Maggiore Policlinico, Cardiovascular Disease Unit, Internal Medicine Dept, Milan, Italy. <sup>2</sup>Dyspnea Lab, Dept of Clinical Sciences and Community Health, University of Milan, Milan, Italy. <sup>3</sup>Dept of Pharmacological and Biomolecular Science, University of Milan, Milan, Italy. <sup>4</sup>EPIGET Lab, Dept of Clinical Sciences and Community Health, University of Milan, Milan, Italy. <sup>5</sup>University of Milan, Dept of Pathophysiology and Transplantation, Milan, Italy. <sup>6</sup>Fondazione IRCCS Ca' Granda Ospedale Maggiore Policlinico, Internal Medicine Dept, Respiratory Unit and Cystic Fibrosis Adult Center, Milan, Italy.

**Correspondence:** Marco Vicenzi, Dept of Clinical Sciences and Community Health, Cardiovascular Disease Unit, University of Milan, Fondazione IRCCS Ca' Granda Ospedale Maggiore Policlinico, Via Francesco Sforza, 35, 20122 Milan, Italy. E-mail: marco.vicenzi@unimi.it

@ERSpublications

**In COVID-19 patients respiratory failure is associated with increased systemic blood pressure, conceivably due to the modulation of the renin-angiotensin-aldosterone system by SARS-CoV-2 infection** <https://bit.ly/3cINsHB>

**Cite this article as:** Vicenzi M, Di Cosola R, Ruscica M, *et al.* The liaison between respiratory failure and high blood pressure: evidence from COVID-19 patients. *Eur Respir J* 2020; 56: 2001157 [<https://doi.org/10.1183/13993003.01157-2020>].

This single-page version can be shared freely online.

*To the Editor:*

Expanding from China around the world, coronavirus 2019 (COVID-19) is the disease caused by severe acute respiratory syndrome-coronavirus-2 (SARS-CoV-2). COVID-19 primarily manifests by hypoxic normo-hypocapnia with preserved lung compliance [1]. In the absence of targeted treatment, sub-intensive clinicians support patients with noninvasive ventilation and anti-inflammatory/anti-viral agents waiting for status improvement. Angiotensin-converting enzyme (ACE)2, highly expressed on the external membrane of lungs, heart, kidney and gastrointestinal tract cells, displays the binding site for the spike protein of SARS-CoV-2 [2]. ACE2, identified as a counterpart of the Renin-Angiotensin-Aldosterone System (RAAS), converts angiotensin (Ang) II to Ang-(1-7) and Ang I to Ang-(1-9). ACE2 activity induces vasodilatation and reduces cell growth and inflammatory response. In experimental models that mimic viral acute respiratory distress syndrome, the absence of *Ace2* led to inflammation, vascular permeability and lung injury *via* activation of the Ang II pathway [3, 4]. The decrease in ACE2 activity by SARS-CoV-2 can unleash a cascade of injurious effects through a heightened imbalance in the actions of the products of ACE *versus* ACE2. Moving to a clinical setting, the ACE2 downregulation may be one of the pathways sustaining arterial hypertension [5] and pulmonary arterial hypertension [6]. Therefore, it is conceivable that in COVID-19 a cleavage of membrane ACE2 along with its circulatory levels could impact on the disease progression and clinical worsening [7]. Thus, to support a pathophysiological role of ACE2, the

present report shares clinical data from an observational study conducted on 40 patients with a diagnosis of COVID-19, hospitalised in the Cardiorespiratory Sub-Intensive COVID-19 Unit at the Fondazione IRCCS Ca' Granda Policlinico Hospital (Milan, Italy).
